# Supplementary material
Source: Research Square preprint supplement (doi:10.21203/rs.3.rs-9582947/v1)
Supplement: Supplementary file 1 [file a605673eb94559a5319804f1.docx]

**Genome-wide characterization of MADS-box genes and their roles in axillary bud development in tobacco**

Yuan Ren1, Rengang Wang23, Mengning Deng1, Kailing Yang1, Kunhe Jiang1, Jiantao Peng12, Guoqin Liu12

Corresponding author: Guoqin Liu

1 College of Tobacco, Guizhou University, Guiyang 550025, People’s Republic of China

2 Guizhou Provincial Key Laboratory for Tobacco Quality Improvement and Efficiency Enhancement, Guiyang 550025, People’s Republic of China

3 Guizhou Academy of Tobacco Science, Guiyang 550081, People’s Republic of China

**Supplementary Figures**





**Fig. S1** Identification of overexpression *NtMADS91* in tobacco. **a** Genetic analysis of tobacco plants. M, DNA marker DL1000; Sample designations: 1-10, over-expression positive plants; 11, positive control (plasmid); 12, negative control (wild-type). **b** Expression detection of *NtMADS91* in the transgenic tobacco plants.
