# Supplementary material
Source: Research Square preprint supplement (doi:10.21203/rs.3.rs-9582947/v1)
Supplement: Supplementary file 2 [file e071155988331f131a009661.xlsx]

## Sheet: Table S1
Table S1 All PCR primers used in this study
Primer name	Forward primer (5′-3′)	Reverse primer (5′-3′)	Terminal Multiplexe (℃)	Function
L25	CCCCTCACCACAGAGTCTGC	AAGGGTGTTGTTGTCCTCAATCTT	53.9	qRT-PCR
NtMADS21	TAAGAAGGCGAAGGAGCTGT	TCCCTTTAGTGGCGAGTTCA	50.7	qRT-PCR
NtMADS30	ACTTGACAGCAAGGCAAGTGA	TCAGCATCACAAAGAGTGGAGA	50.7	qRT-PCR
NtMADS37	TGAACAGCCTTGCTCCAATG	GATATCGAACTGGTATTCATGTTGC	53.9	qRT-PCR
NtMADS41	AGAAAGCGAGCGAACTGAGC	ACCTGTCTTCATGCCCTCCT	52	qRT-PCR
NtMADS42	TGAGGCAGATGAAAGGCGAG	TCAAGCACATGTGTGAGTCCA	56.3	qRT-PCR
NtMADS48	TAACTCAACAGCAAGGCAAGT	AGAGCAACATCAGCATCACAA	52	qRT-PCR
NtMADS57	TCCGACCGCTGCCTTTATTT	TGGGAACTTCGTCTTTCTGGAG	56.3	qRT-PCR
NtMADS91	GGCGTATAGAGAACGCGACA	AGATAACCAATCCAACCTCAGCA	59.4	qRT-PCR
NtMADS93	TTGCTGTCCACCCTTCTCAAT	ATTACTCTCAACGGCCATGC	52	qRT-PCR
NtMADS100	TGTGTGATGCAGAAGTTAGCC	GTCTTGTTAGTACTGGAACTTGAGA	52	qRT-PCR
NtMADS113	TGTGATGCTGATGTTGCTCTC	GAGCAAATTATGCCTGGAGCTA	52	qRT-PCR
NtMADS118	AGAAATGGACTGCTCAAGAAAGC	TGAGCTGCTGCAGAATTCATAGA	52	qRT-PCR
Hyg	CTGCCCGCTGTTCTACAACCGG	GGAGCATATACGCCCGGAGTC	-	Positive identification

## Sheet: Table S2
Table S2 Physicochemical properties of NtMADS-box members in tobacco
Gene name	Gene ID	CDS	Amino acid	Molecular weight	Theoretical pI	Instability index	Grand average of hydropathicity
NtMADS1	Nitab4.5_0004114g0070	528	75	20.01	4.68	49.45	-0.63
NtMADS2	Nitab4.5_0004346g0030	630	209	24.69	8.94	56.79	-0.89
NtMADS3	Nitab4.5_0000047g0280	342	113	12.63	9.88	40.85	-0.026
NtMADS4	Nitab4.5_0000047g0270	408	135	15.44	10.25	63.59	-0.37
NtMADS5	Nitab4.5_0000047g0290	462	153	17.03	9.9	46.7	-0.103
NtMADS6	Nitab4.5_0000047g0250	660	219	24.9	9.34	45.95	-0.375
NtMADS7	Nitab4.5_0000047g0260	552	183	21.05	9.64	49.88	-0.307
NtMADS8	Nitab4.5_0000576g0100	636	211	23.81	8.27	40.75	-0.075
NtMADS9	Nitab4.5_0003390g0060	351	116	12.58	5.31	44.15	-0.177
NtMADS10	Nitab4.5_0000093g0010	495	164	18.93	8.38	28.89	-0.821
NtMADS11	Nitab4.5_0000093g0040	534	177	20.49	8.99	42.6	-0.896
NtMADS12	Nitab4.5_0003336g0080	693	231	26.57	9.35	45.49	-0.765
NtMADS13	Nitab4.5_0000935g0220	201	67	7.4	9.89	30.39	-0.058
NtMADS14	Nitab4.5_0002467g0090	483	160	18.62	9.24	59.38	-0.662
NtMADS15	Nitab4.5_0000514g0010	723	240	27.55	9.03	45.91	-0.704
NtMADS16	Nitab4.5_0000832g0060	294	97	11.52	9.77	53.53	-0.894
NtMADS17	Nitab4.5_0000001g0130	588	195	22.32	9.68	48.38	-0.653
NtMADS18	Nitab4.5_0000001g0140	1176	391	44.16	9.33	44.66	-0.649
NtMADS19	Nitab4.5_0000009g0060	1335	444	50.66	8.82	49.35	-0.749
NtMADS20	Nitab4.5_0000016g0430	654	381	44.19	7.64	56.81	-0.906
NtMADS21	Nitab4.5_0000927g0060	273	114	12.82	8.93	37.58	-0.409
NtMADS22	Nitab4.5_0001113g0010	306	101	11.57	10.13	61.33	-0.538
NtMADS23	Nitab4.5_0004911g0040	366	121	13.96	9.9	38.49	-0.177
NtMADS24	Nitab4.5_0005046g0050	663	220	24.64	9.98	52.25	-0.545
NtMADS25	Nitab4.5_0005046g0070	471	156	18.07	9.25	43.88	-0.093
NtMADS26	Nitab4.5_0005046g0060	657	218	24.79	9.56	40.24	-0.482
NtMADS27	Nitab4.5_0005046g0030	1044	347	38.73	6.48	38.51	-0.363
NtMADS28	Nitab4.5_0005046g0020	1188	396	45.27	10.02	39.07	-0.07
NtMADS29	Nitab4.5_0002516g0060	363	120	14.11	9.97	44.89	-0.945
NtMADS30	Nitab4.5_0001026g0080	567	89	21.5	7.84	52.1	-0.712
NtMADS31	Nitab4.5_0005362g0010	372	124	14.1	9.25	46.48	-0.578
NtMADS32	Nitab4.5_0000163g0010	720	239	27.18	5.07	42.34	-0.697
NtMADS33	Nitab4.5_0000234g0010	822	273	32.01	9.29	43.24	-0.378
NtMADS34	Nitab4.5_0000234g0030	240	80	9.13	9.77	32.92	-0.199
NtMADS35	Nitab4.5_0003507g0010	696	232	26.84	9.37	47.71	0.84
NtMADS36	Nitab4.5_0000518g0100	528	175	21.04	9.59	70.51	-0.767
NtMADS37	Nitab4.5_0003774g0010	639	212	23.63	4.76	35.06	-0.312
NtMADS38	Nitab4.5_0005183g0060	321	164	18.14	8.67	57.83	-0.513
NtMADS39	Nitab4.5_0005183g0070	495	106	11.54	4.56	47.29	-0.276
NtMADS40	Nitab4.5_0000014g0510	696	231	26.71	9.3	67.13	-0.542
NtMADS41	Nitab4.5_0000146g0060	594	197	22.06	7.71	43.76	-0.659
NtMADS42	Nitab4.5_0000131g0290	399	133	15.48	9.57	43.4	-0.395
NtMADS43	Nitab4.5_0000131g0310	273	91	10.64	10.11	38.93	-0.043
NtMADS44	Nitab4.5_0000934g0190	984	327	37.35	5.39	53.25	-0.638
NtMADS45	Nitab4.5_0000715g0210	1329	442	50.96	5.56	3.17	-0.599
NtMADS46	Nitab4.5_0001436g0060	834	277	30.91	9.58	51.83	-0.495
NtMADS47	Nitab4.5_0000153g0130	522	173	20.04	9.4	43.25	-0.709
NtMADS48	Nitab4.5_0001468g0090	573	190	21.09	4.8	51.72	-0.558
NtMADS49	Nitab4.5_0002761g0060	390	129	14.74	9.55	39.56	-0.598
NtMADS50	Nitab4.5_0000154g0260	561	186	21.36	9.52	33.1	-0.408
NtMADS51	Nitab4.5_0002207g0020	519	172	19.63	9.16	46.35	-0.75
NtMADS52	Nitab4.5_0000436g0010	546	181	20.88	8.9	35.83	-0.693
NtMADS53	Nitab4.5_0000977g0160	441	146	16.63	4.76	60.4	-0.512
NtMADS54	Nitab4.5_0000977g0180	330	109	12.39	9.71	40.46	-0.333
NtMADS55	Nitab4.5_0000977g0170	543	180	20.6	9.48	38.42	0.733
NtMADS56	Nitab4.5_0001797g0040	633	212	24.3	9.44	46.71	-0.617
NtMADS57	Nitab4.5_0000140g0130	633	210	24.82	8.98	63.2	-0.874
NtMADS58	Nitab4.5_0000354g0070	258	85	9.7	9.94	50.91	-0.146
NtMADS59	Nitab4.5_0000367g0090	735	244	28.14	9.28	52.04	-0.375
NtMADS60	Nitab4.5_0000367g0080	510	169	19.94	9.1	27.24	-0.576
NtMADS61	Nitab4.5_0000323g0030	807	268	30.91	8.88	44.52	-0.627
NtMADS62	Nitab4.5_0002011g0030	729	242	26.96	9.88	48.13	-0.517
NtMADS63	Nitab4.5_0002011g0080	672	223	25.41	9.49	43.86	-0.452
NtMADS64	Nitab4.5_0000654g0110	582	193	21.94	7.76	40.12	-0.621
NtMADS65	Nitab4.5_0000654g0100	567	188	20.89	8.93	46.39	-0.561
NtMADS66	Nitab4.5_0001932g0030	603	200	22.38	5.89	50.67	-0.651
NtMADS67	Nitab4.5_0003863g0050	729	242	28	5.76	63.83	-0.766
NtMADS68	Nitab4.5_0003184g0040	258	86	9.8	10.44	42.38	0.219
NtMADS69	Nitab4.5_0000167g0220	813	270	31.38	5.9	50.63	-0.743
NtMADS70	Nitab4.5_0000365g0070	816	271	31.64	5.67	46.35	-0.762
NtMADS71	Nitab4.5_0003151g0030	687	228	25.95	7.66	39.38	-0.486
NtMADS72	Nitab4.5_0000036g0250	480	159	17.91	7.72	30.57	-0.275
NtMADS73	Nitab4.5_0000036g0460	480	160	18.27	9.17	43.89	-0.564
NtMADS74	Nitab4.5_0002249g0010	555	185	21.88	8.26	59.76	-0.661
NtMADS75	Nitab4.5_0001541g0050	774	258	29.77	9.35	67.38	-0.892
NtMADS76	Nitab4.5_0000396g0070	498	165	18.93	8.4	25.55	-0.747
NtMADS77	Nitab4.5_0002266g0050	357	118	14.05	10.05	44.31	-0.859
NtMADS78	Nitab4.5_0001244g0010	1002	333	37.63	6.94	52.67	0.66
NtMADS79	Nitab4.5_0002502g0010	558	185	21.5	9.75	34.69	-0.744
NtMADS80	Nitab4.5_0002502g0020	354	118	13.44	9.68	39.62	-0.444
NtMADS81	Nitab4.5_0002779g0040	552	183	20.92	9.86	33.5	-0.884
NtMADS82	Nitab4.5_0002779g0020	558	185	21.38	9.73	31.07	-0.866
NtMADS83	Nitab4.5_0002779g0010	540	179	20.47	9.46	30.03	-0.778
NtMADS84	Nitab4.5_0000772g0020	462	153	17.62	8.85	46.61	-0.833
NtMADS85	Nitab4.5_0000772g0010	606	201	22.48	9.49	49.65	-0.432
NtMADS86	Nitab4.5_0000772g0120	516	171	19.49	9.61	34.86	-0.456
NtMADS87	Nitab4.5_0003480g0020	462	153	17.32	9.54	30.45	-0.831
NtMADS88	Nitab4.5_0003480g0010	534	177	20.31	9.52	35.18	-0.95
NtMADS89	Nitab4.5_0001099g0010	558	185	20.82	9.8	52.78	-0.454
NtMADS90	Nitab4.5_0000915g0190	480	159	18.01	5.13	48.9	-0.502
NtMADS91	Nitab4.5_0001127g0080	510	169	19.36	9.32	49.04	-0.545
NtMADS92	Nitab4.5_0001127g0090	189	62	7	10.59	50.91	-0.29
NtMADS93	Nitab4.5_0001127g0140	753	250	28.3	8.99	55.66	-0.624
NtMADS94	Nitab4.5_0004004g0020	630	209	23.45	9.56	54.88	-0.326
NtMADS95	Nitab4.5_0004004g0010	660	219	24.82	9.24	40.48	-0.253
NtMADS96	Nitab4.5_0001477g0020	669	312	35.41	7.01	47.95	-0.614
NtMADS97	Nitab4.5_0000787g0180	1113	370	42.66	8.64	35.63	-0.761
NtMADS98	Nitab4.5_0001121g0240	783	260	29.98	9.39	53.46	-0.785
NtMADS99	Nitab4.5_0003707g0020	243	80	9.19	10.52	64.19	-0.811
NtMADS100	Nitab4.5_0002228g0010	420	140	16.34	9.07	55.54	-0.734
NtMADS101	Nitab4.5_0003248g0010	714	237	27.2	9.49	47.03	-0.599
NtMADS102	Nitab4.5_0003651g0030	543	180	20.51	9.27	48.64	-0.715
NtMADS103	Nitab4.5_0002860g0020	573	190	21.47	5.12	57.67	-0.83
NtMADS104	Nitab4.5_0000622g0100	531	176	20.3	8.63	40.43	-0.793
NtMADS105	Nitab4.5_0000622g0180	534	177	20.27	8.92	42.39	-0.613
NtMADS106	Nitab4.5_0006477g0040	690	229	26.61	9.47	54.52	-0.813
NtMADS107	Nitab4.5_0000418g0050	639	212	24.77	9.1	58.29	-0.847
NtMADS108	Nitab4.5_0003504g0010	1830	609	68.04	4.56	51.32	-0.416
NtMADS109	Nitab4.5_0001434g0020	684	227	26.08	8.89	44.67	-0.745
NtMADS110	Nitab4.5_0001714g0110	360	119	13.52	9.33	54.12	-0.571
NtMADS111	Nitab4.5_0001242g0040	237	78	9.03	11.3	38.06	-0.355
NtMADS112	Nitab4.5_0000508g0030	630	209	24.62	8.81	54.36	-0.865
NtMADS113	Nitab4.5_0000902g0340	558	186	21.15	7.75	63.21	-0.646
NtMADS114	Nitab4.5_0001997g0120	228	75	8.78	10.75	63.47	-0.404
NtMADS115	Nitab4.5_0001030g0180	576	191	21.86	9.16	43.76	-0.21
NtMADS116	Nitab4.5_0001030g0170	462	153	17.57	10.06	42.06	-0.956
NtMADS117	Nitab4.5_0000027g0080	456	152	17.7	9.65	42.59	-0.747
NtMADS118	Nitab4.5_0000027g0070	630	209	24.23	7.76	62.63	-0.773

## Sheet: Table S3
Table S3 Motif sequences of MADS-box genes
Motif	E-value	Length	Amino acid conserved sequence
Motif 1	1.7e-5311	29	NRQVTFSKRRNGLFKKASELSVLCDAEVA
Motif 2	4.2e-2259	21	JIVFSPTGKLYEFGSPSVESI
Motif 3	5.2e-1458	15	MGRGKIZIKKIENKT
Motif 4	1.0e-1268	35	QRSQRHLLGEDLGSLSLKELQQLENQLERSLKRIR
Motif 5	9.0e-948	29	WWEAPIEKLNYTELSQLKEGLEDLKLKVK
Motif 6	9.7e-1052	50	GIDDKLVZAFRKANVRELNTQLNSJQDZLEFEKKLKSKLKQMNKTVZSQQ
Motif 7	1.7e-521	28	SRKTQLMLDZIEELQQKEKLLHZENKEL
Motif 8	9.0e-412	41	RFSQAKQPFYRMSSRKTTHEKTGGGEENDTMKKKK KKAINE
Motif 9	1.8e-355	50	IYSPYENQPEVWPNTMGAQRVLAEFKRMPEMEQSKK MVNQESFJRZRIAK
Motif 10	5.2e-283	21	LERYEKYKYEERZLEAPLSEK
Motif 11	1.8e-282	11	IDRFLGRNRPP
Motif 12	4.9e-259	15	WQQEYAKLKAQJELL
Motif 13	2.6e-257	50	LNNRREEFDNIKEAASAQTLLLDKMKETGZSYWWESIEQFNADEVTKFEA
Motif 14	3.2e-234	15	NYGTERGYGYENGKW
Motif 15	1.2e-195	41	KKAYGTRBANTVNGNSNSPYRFTVSREVHAPIHLQLSQPEP
